# Supplementary material for: West Nile Virus Surveillance in 2013 via Mosquito Screening in Northern Italy and the Influence of Weather on Virus Circulation
Source: PubMed Central journal article supplement (PMC4619062; doi:10.1371/journal.pone.0140915), 2015-10-21

**S2 Figure. Average of monthly collection of *Culex pipiens* in surveyed stations referred to month of collection.**

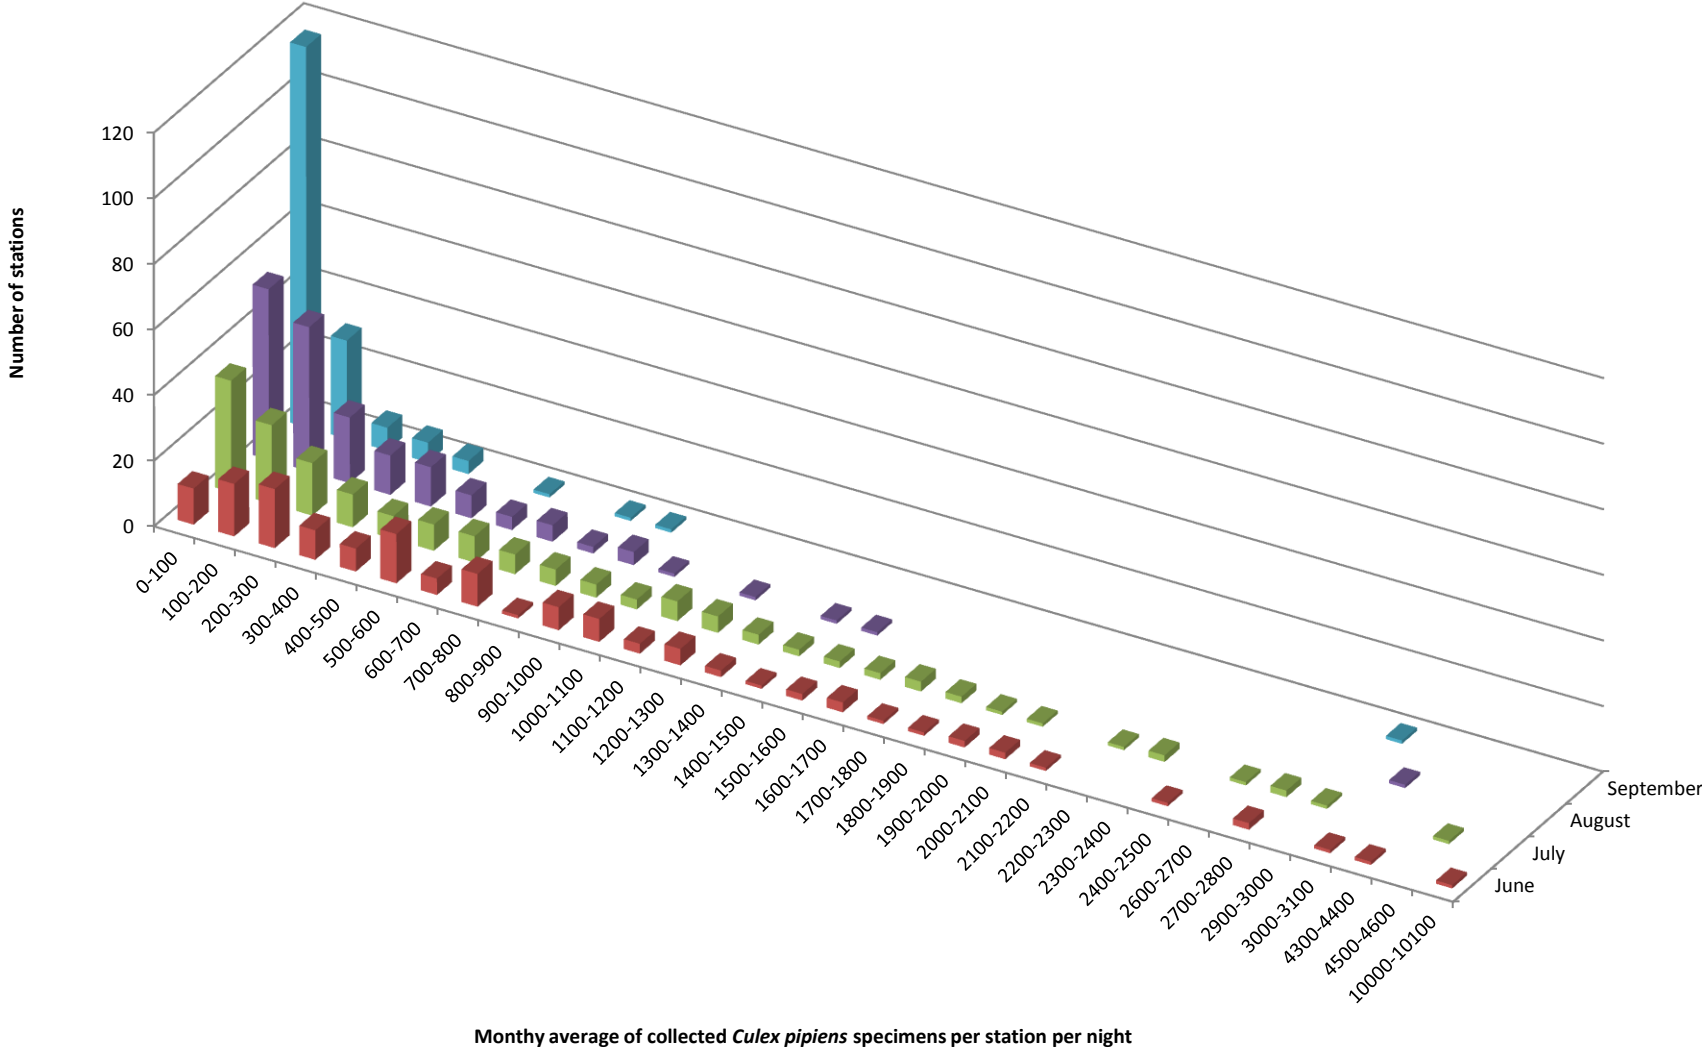

Supplement: pone.0140915.s002.pdf [file pone.0140915.s002.pdf]
